# Supplementary material
Source: HighWire-hosted journal article supplement (http://jneurosci.org/highwire/filestream/599851/field_highwire_adjunct_files/2/27915_1_supp_73005_k8qlr0.pdf)

y = 11

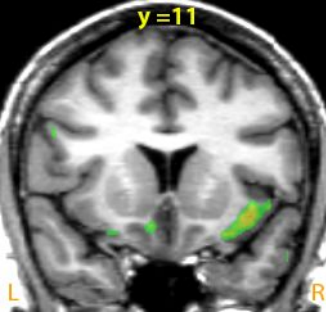

L

R

Supplement: 27915_1_supp_73005_k8qlr0.pdf [file 27915_1_supp_73005_k8qlr0.pdf]
